# Supplementary material for: Assessing Agreement between miRNA Microarray Platforms
Source: PubMed Central journal article supplement (PMC4979053; doi:10.3390/microarrays3040302), 2014-12-12

# Supplementary Information

## Supplementary Tables

**Table S1.** CCC and overall CCC with bootstrap 95% CI (all human miRNAs).

| <i>Sample</i> | <i>Pair</i> | <i>CCC</i> | <i>Affymetrix</i> |               | <i>CCC</i> | <i>Agilent</i> |               | <i>CCC</i> | <i>Illumina</i> |               |
|---------------|-------------|------------|-------------------|---------------|------------|----------------|---------------|------------|-----------------|---------------|
|               |             |            | <i>OCCC</i>       | <i>CI 95%</i> |            | <i>OCCC</i>    | <i>CI 95%</i> |            | <i>OCCC</i>     | <i>CI 95%</i> |
| <i>hREF</i>   | 1–2         | 0.988      |                   |               | 0.997      |                |               | 0.991      |                 |               |
|               | 1–3         | 0.993      | 0.992             | (0.990–0.993) | 0.989      | 0.994          | (0.993–0.995) | 0.993      | 0.994           | (0.994–0.995) |
|               | 2–3         | 0.994      |                   |               | 0.995      |                |               | 0.999      |                 |               |
| <i>A498</i>   | 1–2         | 0.939      |                   |               | 0.975      |                |               | 0.996      |                 |               |
|               | 1–3         | 0.893      | 0.93              | (0.911–0.943) | 0.970      | 0.975          | (0.969–0.979) | 0.981      | 0.989           | (0.987–0.991) |
|               | 2–3         | 0.961      |                   |               | 0.962      |                |               | 0.989      |                 |               |

**Table S2.** CCC and overall CCC with bootstrap 95% CI (all miRNAs).

| <i>Sample</i> | <i>Pair</i> | <i>CCC</i> | <i>Affymetrix</i> |               | <i>CCC</i> | <i>Agilent</i> |               | <i>CCC</i> | <i>Illumina</i> |               |
|---------------|-------------|------------|-------------------|---------------|------------|----------------|---------------|------------|-----------------|---------------|
|               |             |            | <i>OCCC</i>       | <i>CI 95%</i> |            | <i>OCCC</i>    | <i>CI 95%</i> |            | <i>OCCC</i>     | <i>CI 95%</i> |
| <i>hREF</i>   | 1–2         | 0.990      |                   |               | 0.997      |                |               | 0.990      |                 |               |
|               | 1–3         | 0.995      | 0.993             | (0.993–0.994) | 0.990      | 0.994          | (0.994–0.995) | 0.992      | 0.994           | (0.993–0.994) |
|               | 2–3         | 0.996      |                   |               | 0.996      |                |               | 0.999      |                 |               |
| <i>A498</i>   | 1–2         | 0.959      |                   |               | 0.977      |                |               | 0.996      |                 |               |
|               | 1–3         | 0.928      | 0.954             | (0.950–0.957) | 0.970      | 0.976          | (0.970–0.980) | 0.981      | 0.988           | (0.987–0.990) |
|               | 2–3         | 0.976      |                   |               | 0.980      |                |               | 0.988      |                 |               |

**Table S3.** CCC and overall CCC with bootstrap 95% CI (quantile normalization).

| <i>Sample</i> | <i>Pair</i> | <i>CCC</i> | <i>Affymetrix</i> |               | <i>CCC</i> | <i>Agilent</i> |               | <i>CCC</i> | <i>Illumina</i> |               |
|---------------|-------------|------------|-------------------|---------------|------------|----------------|---------------|------------|-----------------|---------------|
|               |             |            | <i>OCCC</i>       | <i>CI 95%</i> |            | <i>OCCC</i>    | <i>CI 95%</i> |            | <i>OCCC</i>     | <i>CI 95%</i> |
| <i>hREF</i>   | 1–2         | 0.992      |                   |               | 0.998      |                |               | 0.999      |                 |               |
|               | 1–3         | 0.994      | 0.994             | (0.992–0.995) | 0.998      | 0.998          | (0.997–0.998) | 0.998      | 0.999           | (0.998–0.999) |
|               | 2–3         | 0.995      |                   |               | 0.998      |                |               | 0.999      |                 |               |
| <i>A498</i>   | 1–2         | 0.972      |                   |               | 0.991      |                |               | 0.998      |                 |               |
|               | 1–3         | 0.967      | 0.971             | (0.963–0.977) | 0.993      | 0.993          | (0.991–0.994) | 0.995      | 0.996           | (0.995–0.997) |
|               | 2–3         | 0.973      |                   |               | 0.994      |                |               | 0.995      |                 |               |

**Table S4.** CCC and overall CCC with bootstrap 95% CI (loess normalization).

| <i>Sample</i> | <i>Pair</i> | <i>Affymetrix</i> |             |               | <i>Agilent</i> |             |               | <i>Illumina</i> |             |               |
|---------------|-------------|-------------------|-------------|---------------|----------------|-------------|---------------|-----------------|-------------|---------------|
|               |             | <i>CCC</i>        | <i>OCCC</i> | <i>CI 95%</i> | <i>CCC</i>     | <i>OCCC</i> | <i>CI 95%</i> | <i>CCC</i>      | <i>OCCC</i> | <i>CI 95%</i> |
| <i>hREF</i>   | 1–2         | 0.989             |             |               | 0.998          |             |               | 0.998           |             |               |
|               | 1–3         | 0.991             | 0.992       | (0.989–0.993) | 0.997          | 0.998       | (0.997–0.998) | 0.998           | 0.998       | (0.998–0.999) |
|               | 2–3         | 0.994             |             |               | 0.998          |             |               | 0.999           |             |               |
| <i>A498</i>   | 1–2         | 0.983             |             |               | 0.990          |             |               | 0.998           |             |               |
|               | 1–3         | 0.978             | 0.981       | (0.976–0.985) | 0.992          | 0.992       | (0.990–0.994) | 0.995           | 0.996       | (0.995–0.997) |
|               | 2–3         | 0.981             |             |               | 0.994          |             |               | 0.995           |             |               |

**Table S5.** Estimates of the linear measurement error model,  $\lambda = 1$  (quantile normalization).

| <i>Sample</i> | <i>Pair</i>             | <i>Estimate</i> | $a_0$               |               | $b_0$            |               |
|---------------|-------------------------|-----------------|---------------------|---------------|------------------|---------------|
|               |                         |                 | <i>Estimate</i>     | <i>CI 95%</i> | <i>Estimate</i>  | <i>CI 95%</i> |
| <i>hREF</i>   | Agilent vs. Affymetrix  | –8.1304         | (–8.4960, –7.7648)  | 2.2040        | (2.1378, 2.2702) |               |
|               | Illumina vs. Affymetrix | –8.3585         | (–9.0694, –7.6476)  | 2.8994        | (2.8071, 2.9918) |               |
|               | Illumina vs. Agilent    | 2.9633          | (2.7599, 3.1668)    | 1.1761        | (1.1204, 1.2319) |               |
| <i>A498</i>   | Agilent vs. Affymetrix  | –9.0705         | (–9.5760, –8.5650)  | 2.3613        | (2.2836, 2.4391) |               |
|               | Illumina vs. Affymetrix | –11.2364        | (–12.5018, –9.9710) | 3.4002        | (3.2772, 3.5233) |               |
|               | Illumina vs. Agilent    | 2.8587          | (2.3850, 3.3325)    | 1.2101        | (1.1250, 1.2952) |               |

**Table S6.** Estimates of  $\lambda$  and CI 95% (quantile normalization). Values obtained as a ratio of  $\sigma_\epsilon^2$  (error variance of Y) and  $\sigma_\delta^2$  (error variance of X), estimated via random effects models.

| <i>Sample</i> | <i>Pair</i>                | $\lambda$ | <i>CI 95%</i> |
|---------------|----------------------------|-----------|---------------|
| <i>hREF</i>   | <i>Agilent-Affymetrix</i>  | 3.116     | 2.878–3.374   |
|               | <i>Illumina-Affymetrix</i> | 3.891     | 3.594–4.213   |
|               | <i>Illumina Agilent</i>    | 1.249     | 1.153–1.352   |
| <i>A498</i>   | <i>Agilent-Affymetrix</i>  | 3.132     | 2.892–3.390   |
|               | <i>Illumina-Affymetrix</i> | 3.827     | 3.535–4.144   |
|               | <i>Illumina-Agilent</i>    | 1.222     | 1.129–1.323   |

**Table S7.** Estimates of the linear measurement error model,  $\lambda$  estimated (quantile normalization).

| <i>Sample</i> | <i>Pair</i>             | $a_0$           |                    | $b_0$           |                  |
|---------------|-------------------------|-----------------|--------------------|-----------------|------------------|
|               |                         | <i>Estimate</i> | <i>CI 95%</i>      | <i>Estimate</i> | <i>CI 95%</i>    |
| <i>hREF</i>   | Agilent vs. Affymetrix  | -5.6388         | (-5.7125, -5.5650) | 1.7689          | (1.7392, 1.7987) |
|               | Illumina vs. Affymetrix | -3.0838         | (-3.1592, -3.0085) | 1.9784          | (1.9483, 2.0084) |
|               | Illumina vs. Agilent    | 3.2250          | (3.0627, 3.3873)   | 1.1179          | (1.0680, 1.1677) |
| <i>A498</i>   | Agilent vs. Affymetrix  | -5.8006         | (-5.8875, -5.7138) | 1.7923          | (1.7600, 1.8245) |
|               | Illumina vs. Affymetrix | -3.1551         | (-3.2488, -3.0614) | 1.9938          | (1.9604, 2.0273) |
|               | Illumina vs. Agilent    | 3.3203          | (2.9651, 3.6755)   | 1.1075          | (1.0338, 1.1812) |

**Table S8.** Number ( $n$ ) and proportion (%) of miRNA lying within the agreement intervals, estimated according to the measurement error model parameters estimated by setting  $\lambda = 1$  and by estimating it via random effects models. Data were normalized according to the quantile normalization algorithm. Confidence intervals for the proportions were computed using the Clopper–Pearson exact method.

| <i>Sample</i> | <i>Comparison</i>          | $\lambda = 1$          |          | $\lambda$ Estimated    |          |
|---------------|----------------------------|------------------------|----------|------------------------|----------|
|               |                            | % ( <i>CI</i> 95%)     | <i>n</i> | % ( <i>CI</i> 95%)     | <i>n</i> |
| <i>hREF</i>   | <i>Agilent-Affymetrix</i>  | 79.46 (76.52, 82.19)   | 646      | 81.55 (78.71, 84.16)   | 663      |
|               | <i>Illumina-Affymetrix</i> | 71.34 (68.1, 74.43)    | 580      | 80.93 (78.06, 83.58)   | 658      |
|               | <i>Illumina-Agilent</i>    | 96.43 (94.92, 97.6)    | 784      | 96.19 (94.63, 97.39)   | 782      |
| <i>A498</i>   | <i>Agilent-Affymetrix</i>  | 78.84 (75.87, 81.6)    | 641      | 82.41 (79.62, 84.97)   | 670      |
|               | <i>Illumina-Affymetrix</i> | 70.48 (67.21, 73.6)    | 573      | 83.89 (81.18, 86.35)   | 682      |
|               | <i>Illumina-Agilent</i>    | 98.52 (97.44, 99.24) † | 801      | 98.77 (97.75, 99.41) † | 803      |

†: the platform pair is in agreement.

**Table S9.** Estimates of the linear measurement error model,  $\lambda = 1$  (loess normalization).

| <i>Sample</i> | <i>Pair</i>             | $a_0$           |                     | $b_0$           |                  |
|---------------|-------------------------|-----------------|---------------------|-----------------|------------------|
|               |                         | <i>Estimate</i> | <i>CI 95%</i>       | <i>Estimate</i> | <i>CI 95%</i>    |
| <i>hREF</i>   | Agilent vs. Affymetrix  | -8.5056         | (-8.8715, -8.1397)  | 2.2852          | (2.2189, 2.3515) |
|               | Illumina vs. Affymetrix | -8.7511         | (-9.4867, -8.0155)  | 2.9867          | (2.8927, 3.0807) |
|               | Illumina vs. Agilent    | 3.0661          | (2.8601, 3.2720)    | 1.1540          | (1.0984, 1.2096) |
| <i>A498</i>   | Agilent vs. Affymetrix  | -8.6769         | (-9.1779, -8.1759)  | 2.2718          | (2.1943, 2.3493) |
|               | Illumina vs. Affymetrix | -11.0793        | (-12.3307, -9.8279) | 3.3492          | (3.2267, 3.4718) |
|               | Illumina vs. Agilent    | 2.6593          | (2.1942, 3.1245)    | 1.2559          | (1.1700, 1.3418) |

**Table S10.** Estimates of  $\lambda$  and CI 95% (loess normalization). Values obtained as ratio of  $\sigma_\epsilon^2$  (error variance of Y) and  $\sigma_\delta^2$  (error variance of X), estimated via random effects models.

| <i>Sample</i> | <i>Pair</i>                | $\lambda$ | CI 95%      |
|---------------|----------------------------|-----------|-------------|
| hREF          | <i>Agilent-Affymetrix</i>  | 3.306     | 3.054–3.579 |
|               | <i>Illumina-Affymetrix</i> | 4.021     | 3.714–4.354 |
|               | <i>Illumina Agilent</i>    | 1.216     | 1.123–1.317 |
| A498          | <i>Agilent-Affymetrix</i>  | 2.967     | 2.740–3.212 |
|               | <i>Illumina-Affymetrix</i> | 3.779     | 3.490–4.091 |
|               | <i>Illumina-Agilent</i>    | 1.274     | 1.176–1.379 |

**Table S11.** Estimates of the linear measurement error model,  $\lambda$  estimated (loess normalization).

| <i>Sample</i> | <i>Pair</i>                    | $a_0$           |                    | $b_0$           |                  |
|---------------|--------------------------------|-----------------|--------------------|-----------------|------------------|
|               |                                | <i>Estimate</i> | CI 95%             | <i>Estimate</i> | CI 95%           |
| hREF          | <i>Agilent vs. Affymetrix</i>  | −5.8600         | (−5.9285, −5.7916) | 1.8232          | (1.7945, 1.8518) |
|               | <i>Illumina vs. Affymetrix</i> | −3.1706         | (−3.2438, −3.0973) | 2.0121          | (1.9825, 2.0418) |
|               | <i>Illumina vs. Agilent</i>    | 3.2998          | (3.1301, 3.4694)   | 1.1030          | (1.0525, 1.1534) |
| A498          | <i>Agilent vs. Affymetrix</i>  | −5.6135         | (−5.7061, −5.5208) | 1.7369          | (1.7036, 1.7703) |
|               | <i>Illumina vs. Affymetrix</i> | −3.1723         | (−3.2666, −3.0780) | 1.9687          | (1.9350, 2.0023) |
|               | <i>Illumina vs. Agilent</i>    | 3.2046          | (2.8815, 3.5276)   | 1.1301          | (1.0585, 1.2017) |

**Table S12.** Number ( $n$ ) and proportion (%) lying within the agreement intervals, estimated according to the measurement error model parameters by setting  $\lambda = 1$  and via random effects models. Data were normalized according to the loess normalization algorithm. Confidence intervals for the proportions were computed using the Clopper–Pearson exact method.

| <i>Sample</i> | <i>Comparison</i>          | $\lambda = 1$        |     | $\lambda$ Estimated   |     |
|---------------|----------------------------|----------------------|-----|-----------------------|-----|
|               |                            | % (CI95%)            | $n$ | % (CI95%)             | $n$ |
| hREF          | <i>Agilent-Affymetrix</i>  | 79.21 (76.26, 81.95) | 644 | 81.18 (78.32, 83.81)  | 660 |
|               | <i>Illumina-Affymetrix</i> | 71.83 (68.60, 74.90) | 584 | 82.90 (80.14, 85.43)  | 674 |
|               | <i>Illumina-Agilent</i>    | 96.06 (94.49, 97.29) | 781 | 95.82 (94.2, 97.09)   | 779 |
| A498          | <i>Agilent-Affymetrix</i>  | 79.95 (77.03, 82.65) | 650 | 83.27 (80.53, 85.77)  | 677 |
|               | <i>Illumina-Affymetrix</i> | 68.76 (65.45, 71.93) | 559 | 83.03 (80.27, 85.54)  | 675 |
|               | <i>Illumina-Agilent</i>    | 98.4 (97.28, 99.15)† | 800 | 98.52 (97.44, 99.24)† | 801 |

† the platform pair is in agreement.

## Supplementary Figures

**Figure S1.** Box and density plots for both samples. The left column refers to hREF and the right column to A498. Plots refer to quantile normalized log<sub>2</sub>-transformed data. (**Lower panels**) The solid line represents the technical replicate labeled as 1 in the datasets, whereas the dashed line and dotted line represent technical Replicates 2 and 3, respectively.

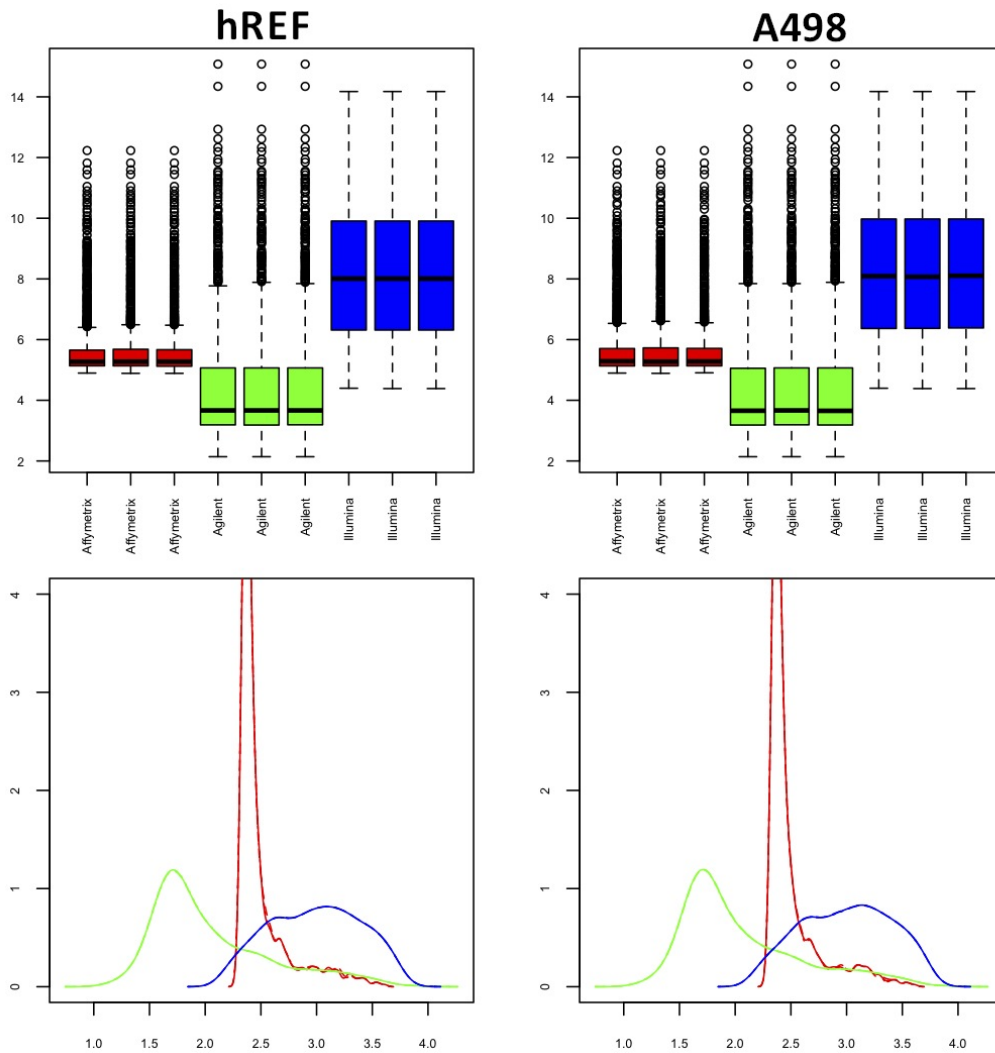

**Figure S2.** Box and density plots for both samples. The left column refers to hREF and the right column to A498. Plots refer to loess normalized log<sub>2</sub>-transformed data. (**Lower panels**) The solid line represents the technical replicate labeled as 1 in the datasets, whereas the dashed line and dotted line represent technical Replicates 2 and 3, respectively.

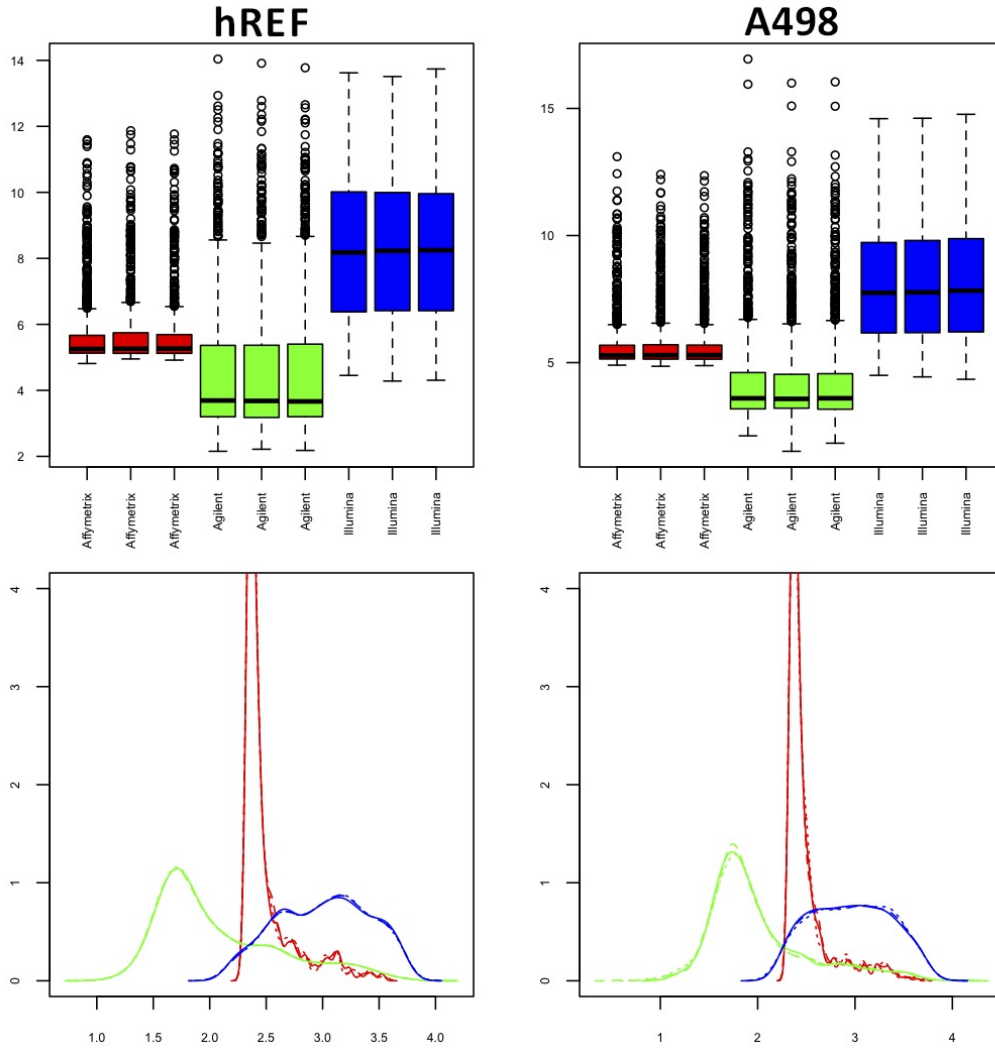

Supplement: microarrays-03-00302-s001.pdf [file microarrays-03-00302-s001.pdf]
